# Supplementary material
Source: publisher figshare collection journal article supplement (https://acs.figshare.com/ndownloader/files/13025471)
Supplement: Supplementary file 1 [file 13025471]

## Surface Adsorption Affects the Performance of Alkaline Anion-Exchange Membrane Fuel Cells

Sandip Maurya<sup>a†</sup>, Joseph H. Dumont<sup>a†</sup>, Claudia Narvaez Villarrubia<sup>a</sup>, Ivana Matanovic<sup>bc</sup>, Dongguo Li<sup>a</sup>, Yu Seung Kim<sup>a,\*</sup>, Sangtaik Noh<sup>d</sup>, Junyoung Han<sup>d</sup>, Chulsung Bae<sup>d</sup>, Hamish A. Miller<sup>e</sup>, Cy H. Fujimoto<sup>f</sup>, and Dario R. Dekel<sup>g,\*</sup>

<sup>a</sup> MPA-11: Materials Synthesis & Integrated Devices, Los Alamos National Laboratory, Los Alamos, NM 87545, USA

<sup>b</sup> Department of Chemical and Biological Engineering, Center for Micro-Engineered Materias (CMEM), The University of New Mexico, Albuquerque, New Mexico 87231, USA

<sup>c</sup> Theoretical Division, Los Alamos National Laboratory, Los Alamos, NM 87545, USA

<sup>d</sup> Department of Chemistry and Chemical Biology, Rensselaer Polytechnic Institute, Troy, New York 12180, USA

<sup>e</sup> Istituto di Chimica dei Composti Organometallici (CNR-ICCOM), via Madonna del Piano 10, 50019 Sesto Fiorentino, Firenze, Italy

<sup>f</sup> Materials Science and Engineering Center, Sandia National Laboratories, Albuquerque, New Mexico 87185, USA

<sup>g</sup> The Wolfson Department of Chemical Engineering, Technion – Israel Institute of Technology, Haifa 3200003, Israel

† Equal Contributors

\*E-mail: [yskim@lanl.gov](mailto:yskim@lanl.gov), [dario@technion.ac.il](mailto:dario@technion.ac.il)

### Content

Figure S1-S4.

Reference

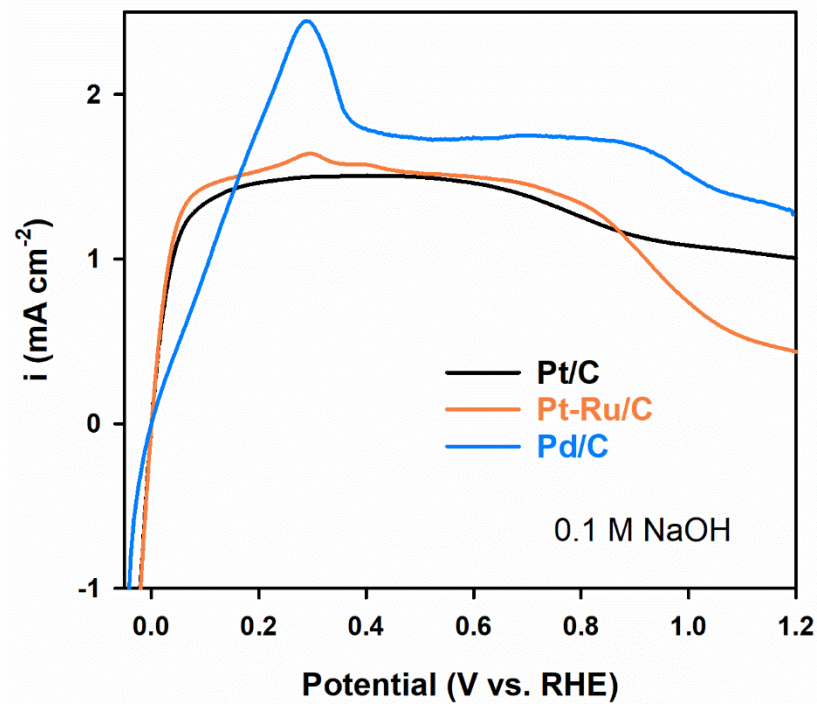

**Figure S1.** RDE experiment in 0.1 M NaOH (a) HOR voltammograms of Pt/C, Pt-Ru/C and Pd/C. The metal loading was  $20 \text{ mg cm}^{-2}$ . The HOR voltammograms were performed at  $25 \text{ }^\circ\text{C}$ ; rotating speed, 900 rpm; and scan rate,  $5 \text{ mV s}^{-1}$ .

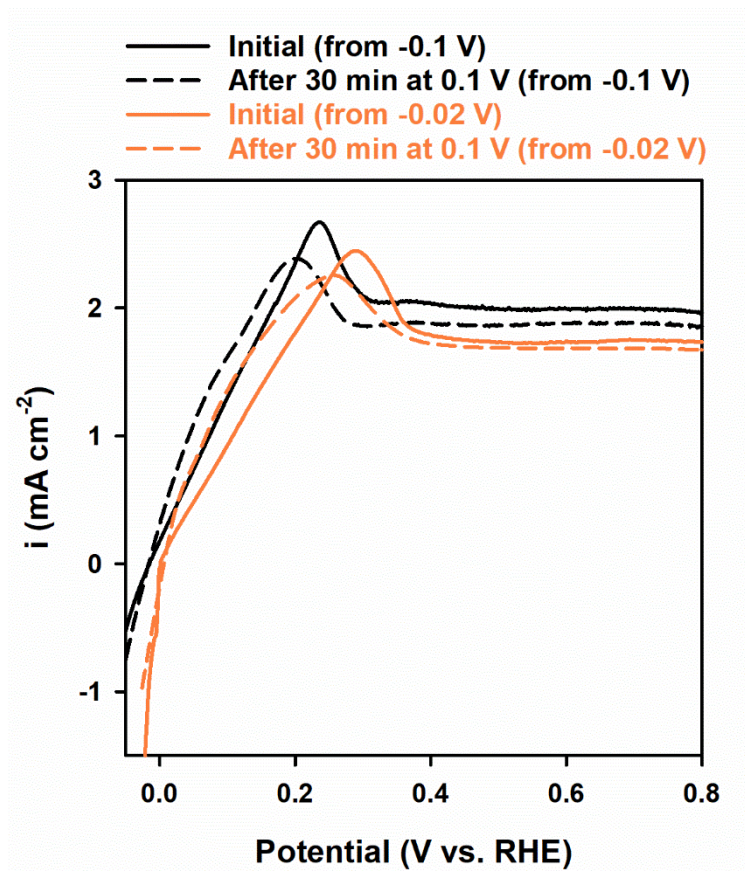

**Figure S2.** Impact of scanning window of the HOR voltammograms of Pd/C in 0.1 M NaOH; Black lines: scanning from  $-0.1$  V vs. RHE, orange lines: scanning from  $-0.02$  V vs. RHE. Solid line: initial voltammogram after preconditioning at  $1.4$  V vs. RHE for 30 sec. Short dash line: after exposure the electrode at  $0.1$  V vs. RHE for 30 min. The HOR voltammograms were performed at  $25$  °C; rotating speed,  $900$  rpm; and scan rate,  $5$  mV s $^{-1}$ .

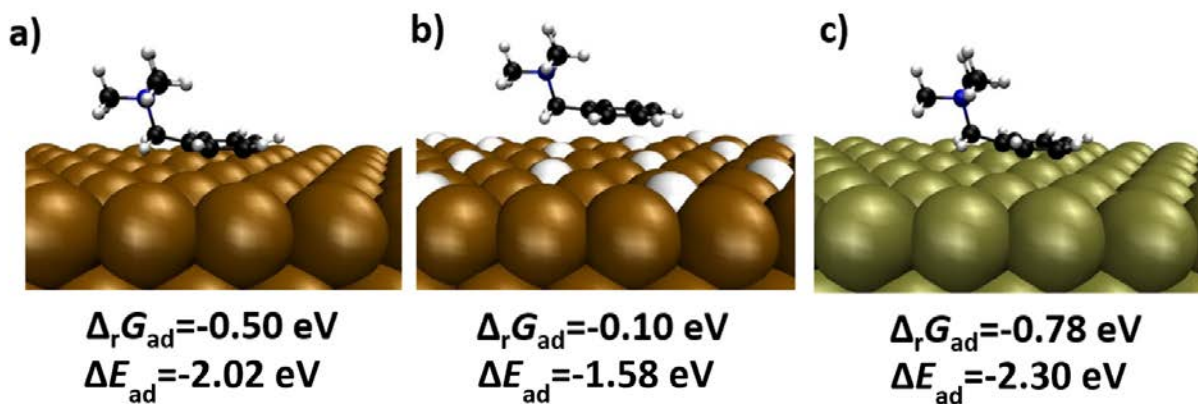

**Figure S3.** DFT calculated geometries, free energy and adsorption energy for the phenyl group on a) Pd, b) Pd with 0.33 ML coverage of H and c) Pt.

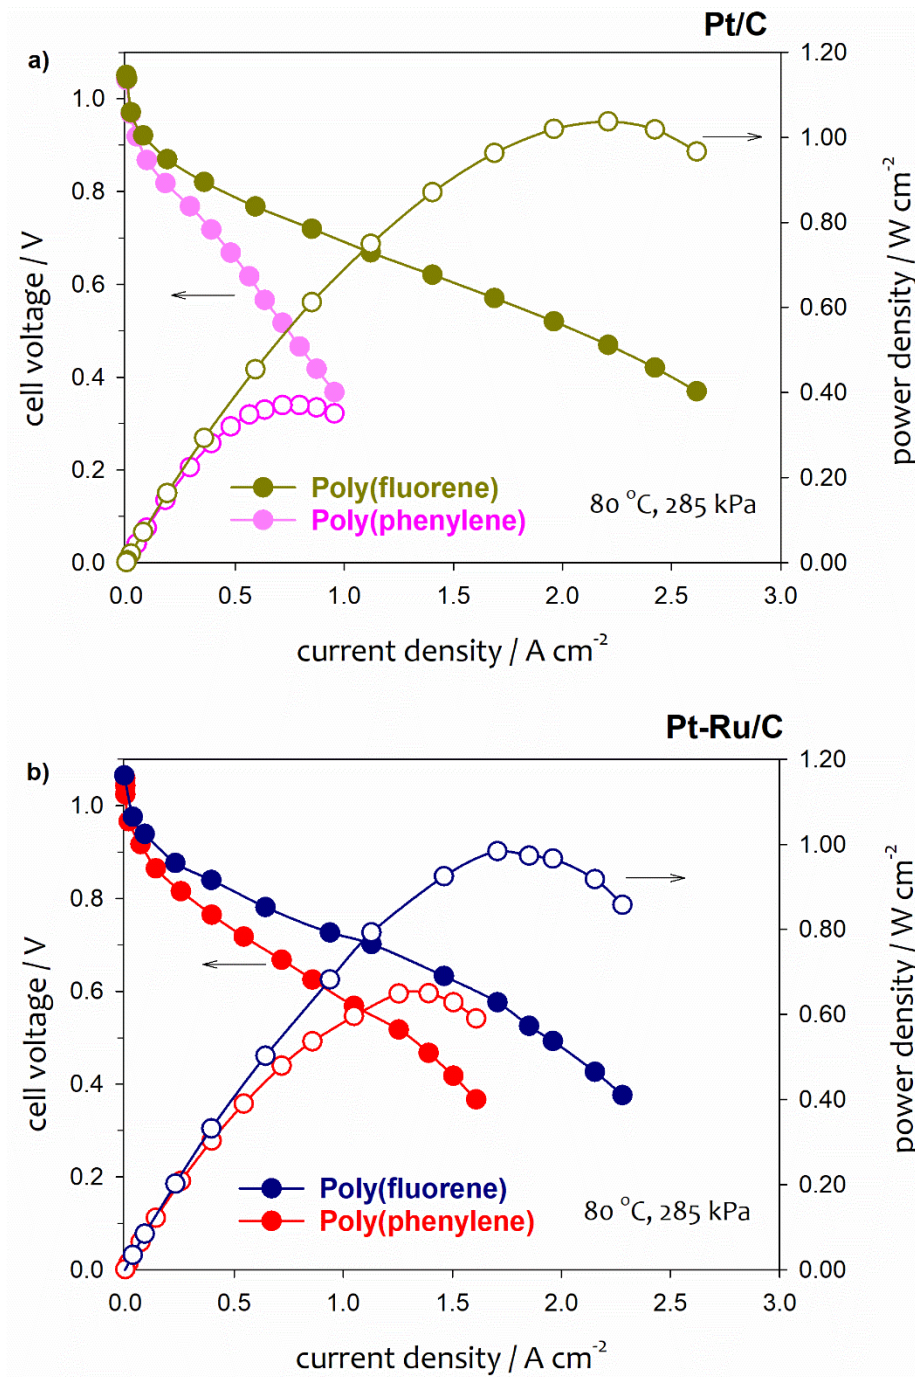

**Figure S4.** Impact of ionomer on Pt/C (a) and Pt-Ru/C (b) anode catalyzed AEMFC performance<sup>1</sup>. Measured at 80 °C under H<sub>2</sub>/O<sub>2</sub> with fully humidified H<sub>2</sub> (500 sccm) and O<sub>2</sub> (300 sccm) at 285 kPa backpressure. Cathode: Pt/C (0.6 mg<sub>Pt</sub> cm<sup>-2</sup>), Anode: Pt/C (0.6 mg<sub>Pt</sub> cm<sup>-2</sup>) or Pt-Ru/C (0.5 mg<sub>Pt</sub> cm<sup>-2</sup>).

**Reference:**

1. Kim, Y. S. Advanced Materials for Fully-Integrated MEAs in AEMFCs, in 2018 U.S. DOE Hydrogen and Fuel Cells Program and Vehicle Technologies Office Annual Merit Review and Peer Evaluation Meeting, June 13-15, 2018. [https://www.hydrogen.energy.gov/pdfs/review18/fc146\\_kim\\_2018\\_o.pdf](https://www.hydrogen.energy.gov/pdfs/review18/fc146_kim_2018_o.pdf), accessed on August 30, 2018.
